# Supplementary material for: How effective are patient safety initiatives? A retrospective patient record review study of changes to patient safety over time
Source: HighWire-hosted journal article supplement (doi:10.1136/bmjqs-2014-003702), 2015-07-06
Supplement: bmjqs-2014-003702supp_appendices.pdf [file bmjqs-2014-003702supp_appendices.pdf]

## APPENDICES

### Appendix 1. hospital and patient characteristics of the total Dutch inpatient hospital population

(source: Dutch Hospital Data/Prismant) in 2004, 2008 and 2011/2012.

| Hospital characteristics                      | Total hospital | Total hospital | Total hospital |
|-----------------------------------------------|----------------|----------------|----------------|
|                                               | population     | population     | population     |
|                                               | 2004*          | 2008*          | 2011/2012*     |
| Inpatient admissions n                        | 1.343.234      | 1.332.602      | 1.678.283      |
| Hospital deaths n (% of total population)     | 42.329 (3.2)   | 35.721 (2.7)   | 37.249 (2.2)   |
| Patient admissions n (% of total sample/ pop) |                |                |                |
| - University hospitals                        | 179.998 (13.4) | 197.269 (14.8) | 219.728 (13.1) |
| - Tertiary teaching                           | 381.625 (28.4) | 584.914 (43.9) | 744.334 (44.4) |
| - General                                     | 781.611 (58.2) | 550.419 (41.3) | 714.221 (42.3) |
| Patient Characteristics                       | Total hospital | Total hospital | Total hospital |
|                                               | population     | population     | population     |
|                                               | 2004*          | 2008*          | 2011/2012*     |
| Male sex %                                    | 48.7           | 49.9           | 49.8           |
| Age y, mean (SD)                              | 55.9 (21.7)    | 56.8 (21.8)    | 57.7 (21.6)    |
| Length of hospital stay d, mean (SD/median)   | 7.3 (10.4/4)   | 6.3 (9.5/3)    | 5.4 (7,0/3)    |
| Patients admitted urgently %                  | 46.6           | 49.5           | 53.1           |
| Hospital departments,                         |                |                |                |
| - Surgery                                     | 24.4           | 23.8           | 23,0           |
| - Cardiology                                  | 16.1           | 17.5           | 17,2           |
| - Internal medicine                           | 16.1           | 15.9           | 17,7           |
| - Orthopaedics                                | 8.7            | 8.2            | 8,4            |
| - Neurology                                   | 6.3            | 6.5            | 7,5            |
| - Lung diseases                               | 6.5            | 7.7            | 8,5            |
| - Ear, nose, throat                           | 4.5            | 3.8            | 3,2            |
| - Urology                                     | 5.0            | 5.0            | 5,1            |
| - Other                                       | 13.1           | 11.6           | 9,3            |

\* Patient admissions of obstetrics, psychiatry, <1 year and <24 hours for non-deceased patients were excluded.

## Appendix 2: multilevel model preventable AE

|                                      | <b>Model AE<br/>OR (95% CI)</b> | <b>Model preventable AE<br/>OR (95% CI)</b> |
|--------------------------------------|---------------------------------|---------------------------------------------|
| inpatient death 2004                 | 2.98 (2.37 to 3.75)             | 3.26 (2.36 to 4.52)                         |
| inpatient death 2008                 | 4.05 (3.10 to 5.30)             | 4.90 (3.23 to 7.42)                         |
| inpatient deaths 2011/2012           | 3.06 (2.31 to 4.06)             | 4.80 (2.81 to 8.22)                         |
| academic hospital 2004               | 1.69 (1.05 to 2.73)             | 0.64 (0.36 to 1.14)                         |
| tertiary teaching hospital 2004      | 1.04 (0.68 to 1.59)             | 1.00 (0.63 to 1.59)                         |
| academic hospital 2008               | 0.83 (0.55 to 1.23)             | 0.65 (0.37 to 1.14)                         |
| tertiary teaching hospital 2008      | 0.95 (0.68 to 1.32)             | 0.93 (0.59 to 1.45)                         |
| academic hospital 2011/2012          | 1.29 (0.91 to 1.82)             | 0.60 (0.33 to 1.09)                         |
| tertiary teaching hospital 2011/2012 | 0.96 (0.72 to 1.29)             | 0.92 (0.61 to 1.40)                         |
| age 2004                             | 1.01 (1.00 to 1.02)             | 1.01 (1.00 to 1.02)                         |
| age 2008                             | 1.00 (1.00 to 1.01)             | 1.01 (1.00 to 1.01)                         |
| age 2011/2012                        | 1.01 (1.00 to 1.01)             | 1.00 (0.99 to 1.01)                         |
| sex 2004                             | 0.97 (0.82 to 1.15)             | 0.94 (0.73 to 1.19)                         |
| sex 2008                             | 0.97 (0.79 to 1.19)             | 1.31 (0.96 to 1.79)                         |
| sex 2011/2012                        | 1.03 (0.83 to 1.28)             | 1.37 (0.92 to 2.03)                         |
| urgent admission 2004                | 0.53 (0.43 to 0.65)             | 0.60 (0.44 to 0.81)                         |
| urgent admission 2008                | 0.63 (0.49 to 0.81)             | 0.73 (0.50 to 1.06)                         |
| urgent admission 2011/2012           | 0.50 (0.38 to 0.65)             | 0.54 (0.34 to 0.88)                         |
| admission to surgical unit 2004      | 1.70 (1.31 to 2.20)             | 1.96 (1.47 to 2.61)                         |
| admission to surgical unit 2008      | 2.83 (2.19 to 3.67)             | 3.69 (2.50 to 5.44)                         |
| admission to surgical unit 2011/2012 | 2.44 (1.86 to 3.21)             | 2.20 (1.42 to 3.41)                         |
|                                      | <b>Model AE<br/>variance*</b>   | <b>Model preventable AE<br/>variance*</b>   |
| hospital level 2004                  | 0.23                            | 0.26***                                     |
| department level 2004                | 0.39                            | 0.29                                        |
| hospital level 2008                  | 0.18                            | 0.16***                                     |
| department level 2008                | 0.30                            | 0.55                                        |
| hospital level 2011/2012             | 0.09                            | X**                                         |
| department level 2011/12             | 0.35                            | 0.55                                        |
| R-squared****                        | 10.1%                           | 12.8%                                       |

\*Variances are the sum of the variances and covariances of that year.

\*\*Variances and covariances could not be calculated and were estimated as zero by model

\*\*\*Covariances of 2011/2012 could not be calculated and were estimated as zero by model

\*\*\*\* McKelvey and Zavoina approximation for the explained proportion of variance for multilevel logistic regression (Snijders, TAB, Bosker, R.J. Multilevel Analysis: An Introduction to Basic and Advanced Multilevel Modeling, second edition. London etc.: Sage Publishers, 2012).

### Appendix 3: Type of preventable AEs per 10.000 patients for 2004, 2008 and 2011/12

|          | Type of harm                            | Preventable AE 2004 | Preventable AE 2008 | Preventable AE 2011/2012 |
|----------|-----------------------------------------|---------------------|---------------------|--------------------------|
| <b>1</b> | <b>Cardiovascular system, total</b>     | <b>41.6</b>         | <b>32.3</b>         | <b>29.6</b>              |
| 1.1      | Cardiac arrest                          | 0.0                 | 2.5                 | 0.0                      |
| 1.2      | Hypotension                             | 3.8                 | 2.5                 | 4.9                      |
| 1.3      | Hypertension                            | 0.0                 | 2.5                 | 0.0                      |
| 1.4      | Shock                                   | 3.8                 | 0.0                 | 2.5                      |
| 1.5      | Arrhythmias or conduction abnormality   | 5.0                 | 0.0                 | 0.0                      |
| 1.6      | Myocardial ischaemia                    | 8.8                 | 0.0                 | 4.9                      |
| 1.7      | Heart failure                           | 15.1                | 7.5                 | 9.9                      |
| 1.8      | Aneurysm                                | 0.0                 | 0.0                 | 2.5                      |
| 1.9      | Other cardiovascular event              | 5.0                 | 17.4                | 4.9                      |
| <b>2</b> | <b>Respiratory system, total</b>        | <b>39.1</b>         | <b>62.1</b>         | <b>19.8</b>              |
| 2.3      | Pneumothorax                            | 2.5                 | 5.0                 | 0.0                      |
| 2.4      | Atelectasis                             | 1.3                 | 0.0                 | 0.0                      |
| 2.5      | Bronchospasm                            | 0.0                 | 0.0                 | 2.5                      |
| 2.6      | Aspiration                              | 7.6                 | 12.4                | 4.9                      |
| 2.7      | Pulmonary embolus                       | 15.1                | 24.9                | 4.9                      |
| 2.9      | Other respiratory event                 | 12.6                | 19.9                | 7.4                      |
| <b>3</b> | <b>Renal or endocrine system, total</b> | <b>36.6</b>         | <b>34.8</b>         | <b>34.6</b>              |
| 3.1      | Fluid overload                          | 5.0                 | 5.0                 | 2.5                      |
| 3.2      | Dehydration or oliguria                 | 2.5                 | 5.0                 | 0.0                      |
| 3.5      | Hyperglycaemia                          | 2.5                 | 2.5                 | 2.5                      |
| 3.6      | Hypoglycaemia                           | 2.5                 | 5.0                 | 7.4                      |
| 3.7      | Hyperkalaemia                           | 3.8                 | 2.5                 | 9.9                      |
| 3.8      | Renal insufficiency                     | 5.0                 | 12.4                | 4.9                      |
| 3.9      | Other renal or endocrine event          | 15.1                | 2.5                 | 7.4                      |
| <b>4</b> | <b>Haematologic system, total</b>       | <b>22.7</b>         | <b>37.3</b>         | <b>9.9</b>               |
| 4.1      | Haemorrhage                             | 15.1                | 14.9                | 2.5                      |
| 4.2      | Thromboembolic venous event             | 3.8                 | 7.5                 | 2.5                      |
| 4.3      | Haematoma                               | 0.0                 | 7.5                 | 2.5                      |
| 4.4      | Other haematologic event                | 3.8                 | 7.5                 | 2.5                      |
| <b>5</b> | <b>Gastrointestinal system, total</b>   | <b>39.1</b>         | <b>64.6</b>         | <b>37.1</b>              |
| 5.1      | Nausea or vomiting                      | 0.0                 | 2.5                 | 2.5                      |
| 5.2      | Diarrhoea                               | 0.0                 | 0.0                 | 0.0                      |
| 5.5      | Pancreatitis                            | 0.0                 | 0.0                 | 2.5                      |
| 5.6      | Ileus                                   | 3.8                 | 22.4                | 4.9                      |
| 5.7      | Intestinal tract bleeding               | 10.1                | 0.0                 | 7.4                      |
| 5.8      | Perforation                             | 10.1                | 12.4                | 14.8                     |

|          |                                                        |             |              |             |
|----------|--------------------------------------------------------|-------------|--------------|-------------|
| 5.9      | Other gastrointestinal event                           | 15.1        | 27.3         | 4.9         |
| <b>6</b> | <b>Neurologic system, total</b>                        | <b>37.9</b> | <b>14.9</b>  | <b>19.8</b> |
| 6.2      | Delirium or encephalopathy                             | 3.8         | 5.0          | 2.5         |
| 6.3      | Seizure                                                | 0.0         | 2.5          | 2.5         |
| 6.4      | Stroke or intracerebral haemorrhage                    | 15.1        | 2.5          | 4.9         |
| 6.5      | Coma                                                   | 0.0         | 0.0          | 7.4         |
| 6.6      | Withdrawal symptoms                                    | 2.5         | 2.5          | 0.0         |
| 6.8      | Other neurologic event                                 | 16.4        | 2.5          | 2.5         |
| <b>7</b> | <b>Hospital acquired infection, total</b>              | <b>36.6</b> | <b>87.0</b>  | <b>46.9</b> |
| 7.1      | Catheter-related bloodstream infection                 | 2.5         | 5.0          | 2.5         |
| 7.2      | Sepsis or bacteraemia unrelated to catheter            | 15.1        | 54.7         | 24.7        |
| 7.3      | Ventilator-associated pneumonia                        | 1.3         | 0.0          | 0.0         |
| 7.4      | Nosocomial pneumonia, not ventilator-related           | 3.8         | 9.9          | 4.9         |
| 7.5      | Urinary tract infection                                | 6.3         | 0.0          | 0.0         |
| 7.6      | Surgical site infection                                | 1.3         | 7.5          | 2.5         |
| 7.8      | Clostridium difficile colitis                          | 0.0         | 0.0          | 2.5         |
| 7.9      | Phlebitis                                              | 0.0         | 0.0          | 2.5         |
| 7.10     | Infected foreign material                              | 2.5         | 5.0          | 2.5         |
| 7.11     | Other hospital acquired infection                      | 3.8         | 5.0          | 4.9         |
| <b>8</b> | <b>Surgical event, total</b>                           | <b>94.6</b> | <b>121.8</b> | <b>49.9</b> |
| 8.1      | Postoperative haemorrhage                              | 15.1        | 37.3         | 2.5         |
| 8.2      | Postoperative haematoma                                | 2.5         | 2.5          | 2.5         |
| 8.3      | Postoperative abscess                                  | 2.5         | 2.5          | 2.5         |
| 8.4      | Laceration or other organ injury                       | 13.9        | 0.0          | 4.9         |
| 8.5      | Unplanned removal of organ after intraoperative injury | 0.0         | 9.9          | 0.0         |
| 8.6      | Vascular injury                                        | 2.5         | 0.0          | 0.0         |
| 8.7      | Nerve injury                                           | 3.8         | 0.0          | 0.0         |
| 8.9      | Wound dehiscence                                       | 3.8         | 2.5          | 0.0         |
| 8.10     | Anastomotic leakage                                    | 6.3         | 7.5          | 2.5         |
| 8.11     | Postoperative fistula                                  | 2.5         | 0.0          | 0.0         |
| 8.12     | Failed procedure                                       | 29.0        | 2.5          | 29.6        |
| 8.13     | Unplanned return to surgery                            | 0.0         | 9.9          | 0.0         |
| 8.14     | Other event                                            | 12.6        | 47.2         | 4.9         |
| <b>9</b> | <b>Other types of harm, total</b>                      | <b>94.6</b> | <b>121.8</b> | <b>49.4</b> |
| 9.2      | Pyrexia                                                | 0.0         | 5.0          | 2.5         |
| 9.4      | Allergic reaction                                      | 0.0         | 0.0          | 0.0         |
| 9.5      | Pressure ulcer                                         | 5.0         | 0.0          | 0.0         |
| 9.6      | Rash                                                   | 1.3         | 7.5          | 0.0         |
| 9.7      | Catheter complication                                  | 0.0         | 0.0          | 0.0         |
| 9.8      | Fracture                                               | 6.3         | 2.5          | 4.9         |

|     |                    |      |      |      |
|-----|--------------------|------|------|------|
| 9.9 | Other type of harm | 36.6 | 42.3 | 22.2 |
|-----|--------------------|------|------|------|
